# Supplementary material for: Perovskite single crystal SCLC measurement prediction using a machine learning model
Source: Royal Society of Chemistry journal article supplement (doi:10.1039/d4tc01987c), 2024-01-01
Supplement: d4tc01987c1.pdf [file d4tc01987c1.pdf]

SI updated: 29 July 2024

## Supplementary Information

### Perovskite Single Crystal SCLC Measurements Prediction Using Machine Learning Model

Sarvani Jowhar Khanam,<sup>a</sup> Harinath Kuruva,<sup>b</sup> Salman Abdul Moiz\*<sup>b</sup> and Murali Banavoth\*<sup>a</sup>

<sup>a</sup> *Solar Cells and Photonics Research Laboratory, School of Chemistry, University of Hyderabad, Hyderabad 500046, Telangana, India.*

<sup>b</sup> *School of Computer & Information Sciences, University of Hyderabad, Hyderabad 500046, Telangana, India*

*corresponding author: E-mail: salman@uohyd.ac.in*

#### **SCLC measurements:**

We have calculated the Resistivity and Conductivity of devices by applying Ohm's Law (eq. 1) to I-V curves, which has been measured using the solar simulator and Keithley 2400.

$V = IR$ .....(1) Resistance has been calculated by fitting the I-V curve of SCLC data, following the steps below.

$$R = \frac{V}{I}$$

Dividing the area (A) in the above equation.

$$\frac{IR}{A} = \frac{V}{A}$$

$$JR = \frac{V}{A}$$

$$\log J + \log R = \log V - \log A$$

$$\log J = \log V - \log A - \log R \quad \log J = \log V - (\log A + \log R) \quad \dots\dots\dots (2)$$

Which is in the form of

$y = mx + c$  Resistance (R) has been calculated by considering the intercept of  $\log J$  vs  $\log V$  of SCLC data. Subsequently, compared both equations and calculated the R-value followed by resistivity ( $\rho$ ) by adding resulted R values in the below equation.

$$R = \rho \frac{d}{A}$$

$$\rho = R \frac{A}{d} \dots\dots\dots(3)$$

$d$  is the thickness of the device,  $\rho$  is resistivity, and  $A$  is the area.

Conductivity ( $\sigma$ ) is the reciprocal of resistivity ( $\rho$ ).

$$\sigma = \frac{1}{\rho} \dots\dots\dots(4)$$
